# Supplementary material for: Clinical significance of delta neutrophil index in the differential diagnosis between septic arthritis and acute gout attack within 24 hours after hospitalization
Source: PubMed Central journal article supplement (PMC5627811; doi:10.1097/md.0000000000007431), 2017-07-28
Supplement: medi-96-e7431-s001.pdf [file medi-96-e7431-s001.pdf]

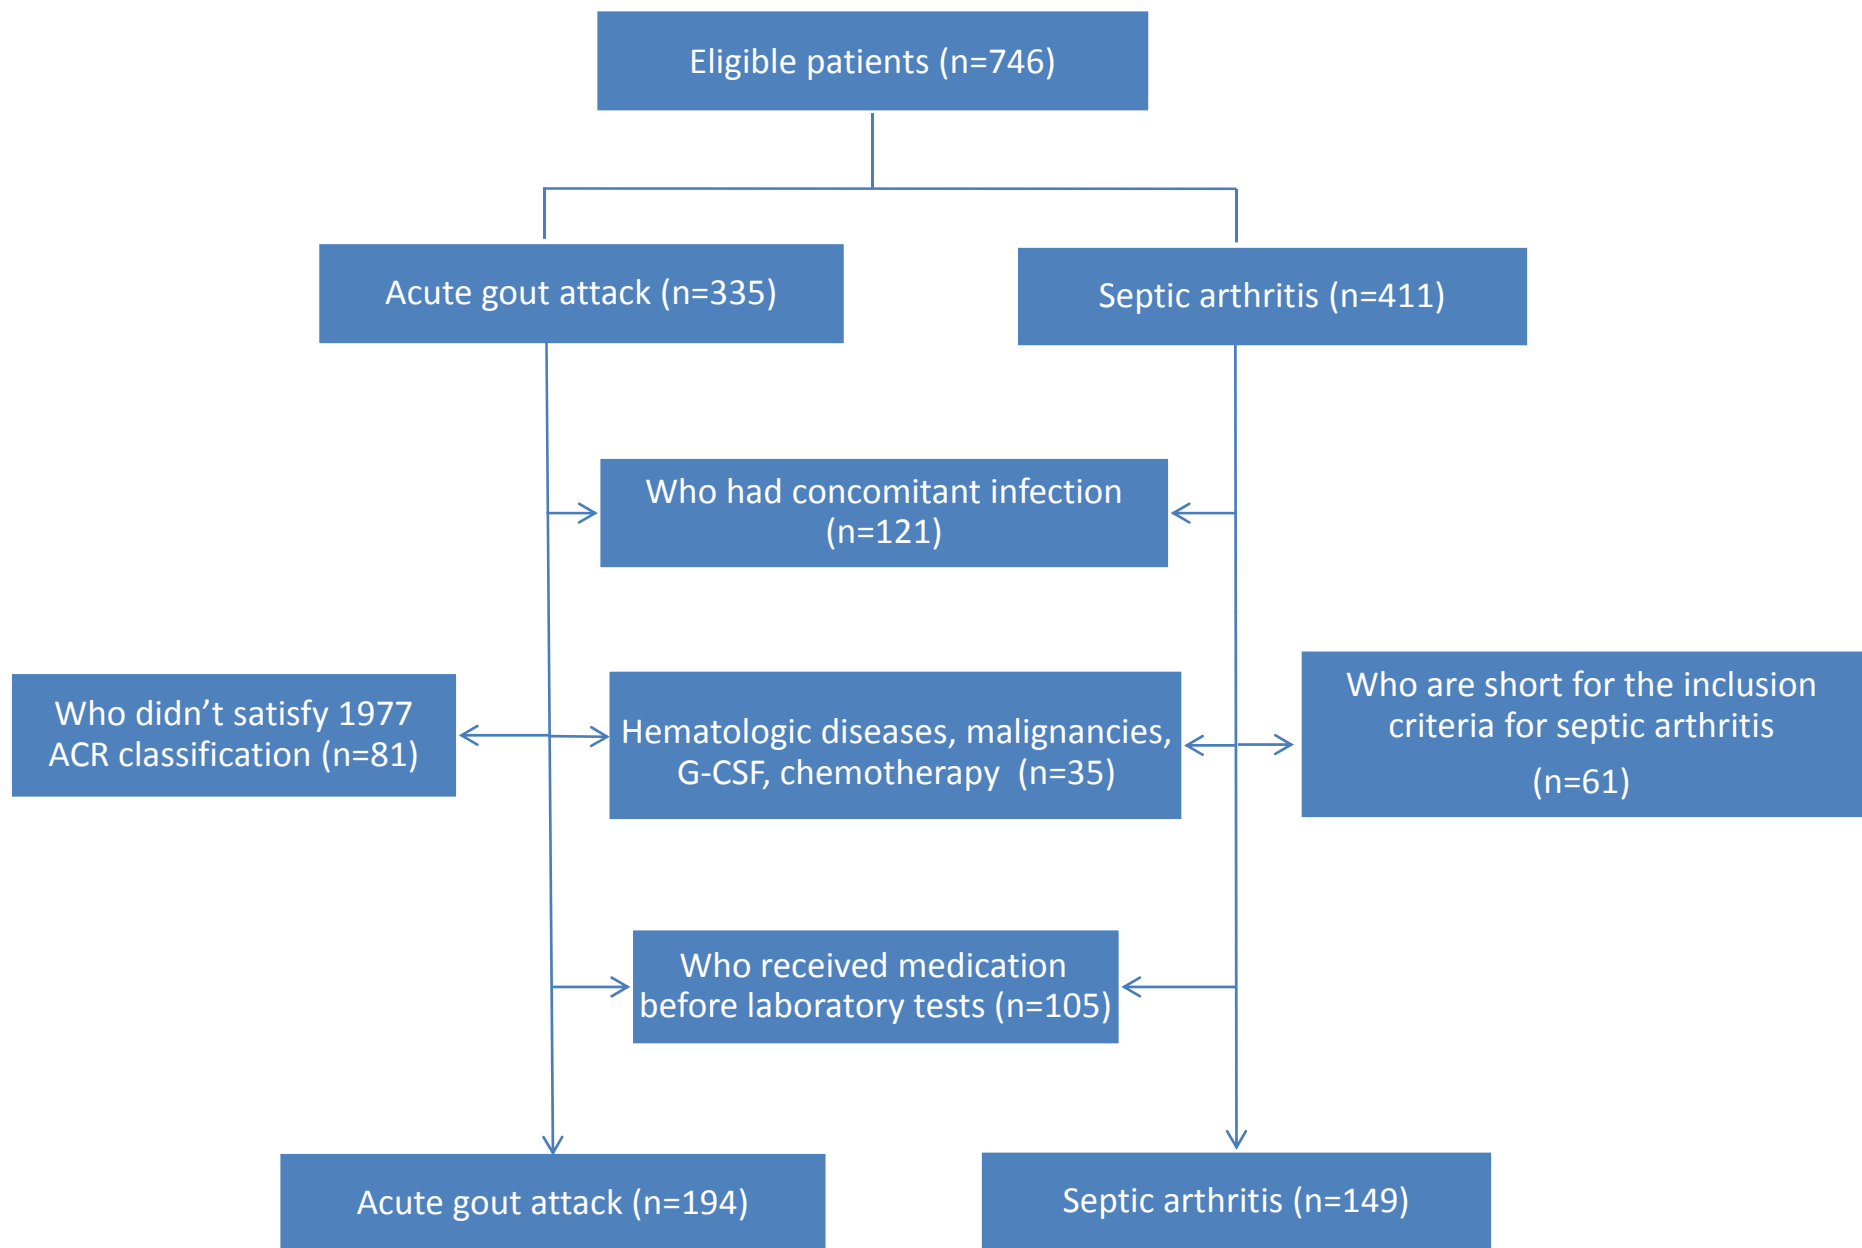

**S1 Figure. Enrollment of study population.**

We collected 194 patients with acute gout attack and 149 patients with septic arthritis in this study according to algorithm as shown.

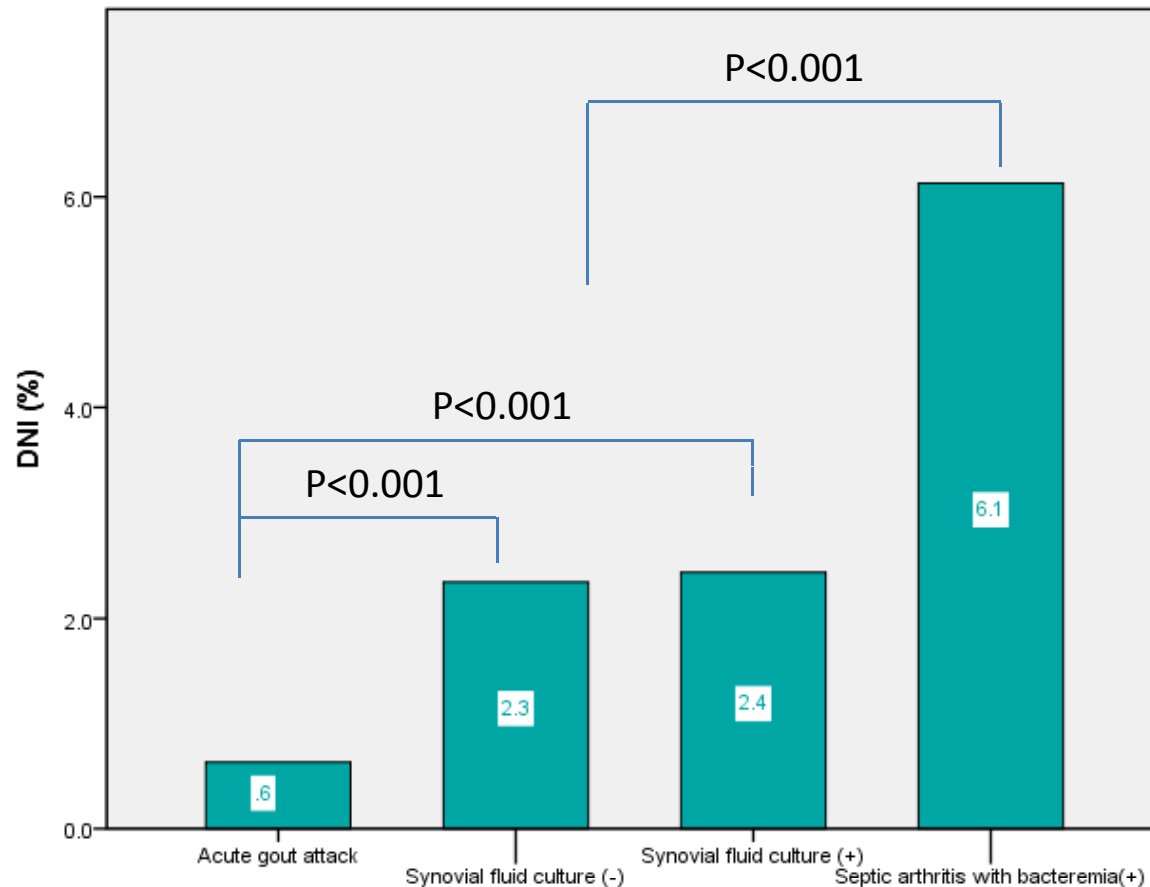

**S2 Figure. Comparison of DNI in patients with septic arthritis with or without culture results and those with acute gout attack.**

We divided the patients with septic arthritis into three subgroups according to culture results: septic arthritis with negative cultures (n=51), septic arthritis with positive synovial cultures (n=66), and septic arthritis with bacteremia (n=34). Patients with acute gout attack had lower DNI than all the subgroups of septic arthritis. DNI increased as the bacterial burden got heavier. Among patients with septic arthritis, patients with bacteremia showed higher DNI than those without bacteremia (0.6% for acute gout attack vs. 2.3% for septic arthritis with negative culture results vs. 2.4% for septic arthritis with positive synovial culture vs. 6.1% for septic arthritis with bacteremia,  $p < 0.001$ ).
